# Supplementary material for: Kullback–Leibler Divergence of Sleep-Wake Patterns Related with Depressive Severity in Patients with Epilepsy
Source: MDPI journal article supplement (doi:10.3390/brainsci13050823), 2023-05-19
Supplement: s1 [file s1]

## Supplement

**Supplement Table S1. Correlative analysis between HAMD-17 scores and external variables.**

| External variable         | r-value | p-value |
|---------------------------|---------|---------|
| Sex                       | -0.12   | 0.35    |
| Age                       | 0.02    | 0.86    |
| Age at epilepsy diagnosis | 0.06    | 0.64    |
| Epilepsy duration         | -0.13   | 0.33    |
| Epilepsy type             | 0.21    | 0.09    |
| ASD numbers               | 0.01    | 0.98    |
| MMSE                      | -0.27   | 0.04*   |
| DS-forward                | -0.10   | 0.45    |
| DS-backward               | -0.24   | 0.07    |
| VFT-animals               | -0.10   | 0.48    |
| SDMT                      | -0.13   | 0.42    |
| AVLT immediate recall     | -0.18   | 0.19    |
| AVLT delayed recall       | -0.10   | 0.50    |
| AVLT recognition          | -0.05   | 0.74    |

Note: HAMD-17 = 17-item Hamilton Depression Rating Scale, MMSE = Mini-Mental State Examination, AVLT = Rey Auditory Verbal Learning Test, DS = digital span, SDMT = Symbol Digit Modalities Test, and VFT = verbal fluency test.

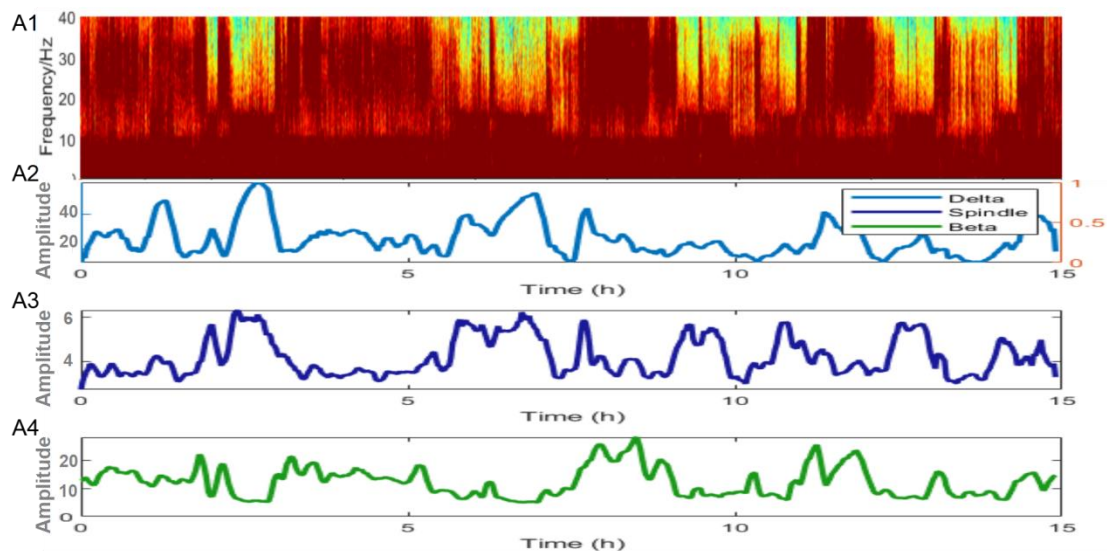

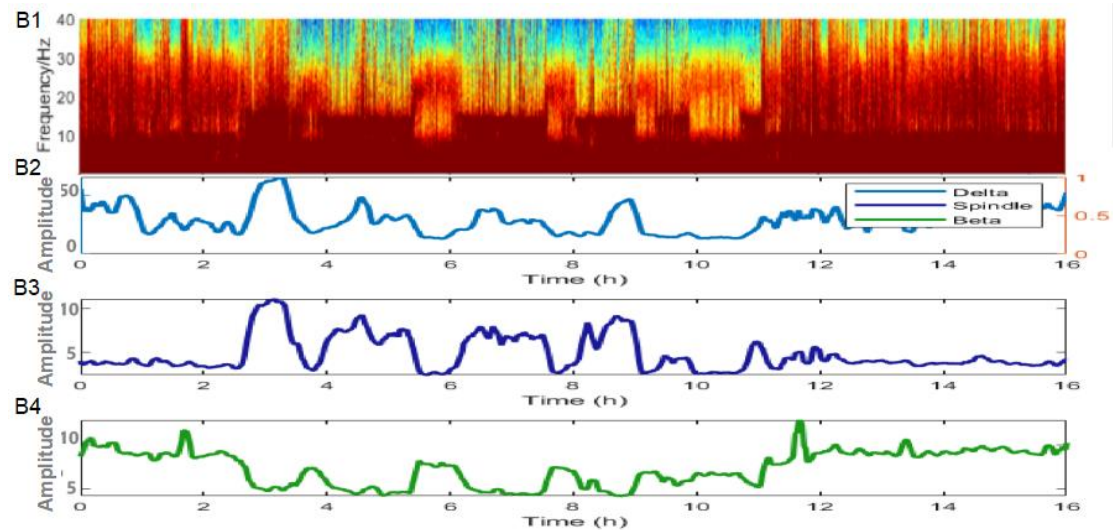

**Supplement Figure S1.** Spectrogram and envelope diagrams in patients with depression and without depression. (A) Patients with depression. A1: time-frequency diagram, A2: time-dependent envelope of delta bands, A3: time-dependent envelope of spindle bands A4:time-dependent envelope of beta bands; (B) Patients without depression. B1: time-frequency diagram, B2: time-dependent envelope of delta bands, B3: time-dependent envelope of spindle bands, B4:time-dependent envelope of beta bands.
